# Supplementary material for: Synthesis and characterization of amino-capped oligothiophene-based hole-transport materials
Source: Royal Society of Chemistry journal article supplement (doi:10.1039/b510826h), 2005-01-01
Supplement: b510826h.pdf [file b510826h.pdf]

**Paper Ref.: B510826H**

**Supplementary materials for**

**Synthesis and characterization of amino-capped oligothiophene-based hole-transport materials**

**Olivier Clot,<sup>a</sup> Don Selmaren<sup>\*a</sup> and Michael J. McNevin<sup>b</sup>**

<sup>a</sup> National Renewable Energy Laboratory, 1617 Cole Blvd, Golden, CO, 80401; E-mail: don\_selmarten@nrel.gov

<sup>b</sup> Department of Chemistry and Biochemistry, University of Colorado, Boulder, CO, 80309-0215, USA

**Table 1.** Crystal data and collection parameters for **DBAT1** and **-2**:

| Compound                               | <b>DBAT1</b>                                                                   | <b>DBAT2</b>                                                                   |
|----------------------------------------|--------------------------------------------------------------------------------|--------------------------------------------------------------------------------|
| Formula                                | (C <sub>36</sub> H <sub>50</sub> N <sub>2</sub> S)                             | (C <sub>40</sub> H <sub>52</sub> N <sub>2</sub> S <sub>2</sub> )               |
| Formula weight                         | 542.84                                                                         | 624.96                                                                         |
| Space group                            | P2 <sub>1</sub> /n (#14)                                                       | P-1 (#2)                                                                       |
| Temp                                   | -116 °C                                                                        | -116 °C                                                                        |
| a (Å)                                  | 12.301(5)                                                                      | 12.0888(6)                                                                     |
| b (Å)                                  | 16.426(6)                                                                      | 12.1517(7)                                                                     |
| c (Å)                                  | 16.316(7)                                                                      | 12.8142                                                                        |
| Volume (Å <sup>3</sup> )               | 3256(2)                                                                        | 1792.92(16)                                                                    |
| α (deg)                                | 90                                                                             | 84.4140(10)                                                                    |
| β (deg)                                | 99.026(9)                                                                      | 73.1610(10)                                                                    |
| γ (deg)                                | 90                                                                             | 87.552(2)                                                                      |
| Z                                      | 4                                                                              | 2                                                                              |
| Dcalc (g/cm <sup>3</sup> )             | 1.107                                                                          | 1.158                                                                          |
| Diffractionmeter                       | Siemens SMART                                                                  | Siemens SMART                                                                  |
| Radiation                              | Mo-Kα                                                                          | Mo-Kα                                                                          |
| Monochromator                          | Graphite                                                                       | Graphite                                                                       |
| Detector                               | CCD area detector                                                              | CCD area detector                                                              |
| Scan type, deg                         | ω scans, 0.3                                                                   | ω scans, 0.3                                                                   |
| frame collection type (s)              | 30                                                                             | 30                                                                             |
| reflections measured                   | hemisphere                                                                     | hemisphere                                                                     |
| 2θ range (°)                           | 3.5-55.0                                                                       | 3.5-55.0                                                                       |
| μ (cm <sup>-1</sup> )                  | 0.125                                                                          | 0.178                                                                          |
| Tmin, Tmax                             | 0.943, 0.956                                                                   | 0.924, 0.982                                                                   |
| Crystal Dimensions (mm <sup>-1</sup> ) | 0.48 X 0.43 X 0.36                                                             | 0.45 X 0.42 X 0.10                                                             |
| no. of reflections measured            | 18719                                                                          | 14383                                                                          |
| no. of observations                    | 7394                                                                           | 8224                                                                           |
| no. of restraints                      | 4                                                                              | 0                                                                              |
| no. of parameters                      | 347                                                                            | 391                                                                            |
| R Int                                  | 0.0974                                                                         | 0.0659                                                                         |
| R                                      | 0.0877 for 4536 data F <sub>0</sub> > 4σ(F <sub>0</sub> ); 0.1388 for all data | 0.1022 for 3229 data F <sub>0</sub> > 4σ(F <sub>0</sub> ); 0.2211 for all data |
| wR2                                    | 0.2232 for 4536 data F <sub>0</sub> > 4σ(F <sub>0</sub> ); 0.2592 for all data | 0.2708 for 3229 data F <sub>0</sub> > 4σ(F <sub>0</sub> ); 0.3438 for all data |

Electronic Supplementary Material for Journal of Materials Chemistry  
This journal is © The Royal Society of Chemistry 2005

|     |       |       |
|-----|-------|-------|
| GOF | 1.036 | 1.010 |
|-----|-------|-------|

**Table 2.** Selected Bond Distances and Angles for **DBAT1**

|            |        |             |        |           |        |
|------------|--------|-------------|--------|-----------|--------|
| C9-C10     | 1.37   | C27-C28     | 1.36   | N1-C11    | 1.46   |
| C8-C9      | 1.45   | C26-C27     | 1.45   | N1-C15    | 1.45   |
| C7-C8      | 1.34   | C25-C26     | 1.34   | N2-C29    | 1.45   |
| C4-C7      | 1.46   | C22-C25     | 1.46   | N2-C33    | 1.45   |
| N1-C1      | 1.38   | N2-C19      | 1.38   | S1-C9     | 1.74   |
| S1-C27     | 1.74   | C25-C26-C27 | 125.70 | C7-C8-C9  | 126.61 |
| C4-C7-C8   | 125.69 | C22-C25-C26 | 127.64 | C9-S1-C27 | 92.23  |
| C11-N1-C15 | 117.42 | C29-N2-C33  | 117.26 | C1-N1-C11 | 121.21 |

**Table 3.** Selected Bond Distances and Angles for **DBAT2**

|            |       |            |       |             |       |
|------------|-------|------------|-------|-------------|-------|
| N1-C1      | 1.37  | N2-C21     | 1.37  | S1-C12      | 1.73  |
| S1-C9      | 1.74  | S2-C29     | 1.74  | S2-C32      | 1.71  |
| C7-C8      | 1.36  | C27-C28    | 1.35  | C8-C9       | 1.43  |
| C28-C29    | 1.43  | C4-C7      | 1.44  | C24-C27     | 1.45  |
| S1-C9-C8   | 122.7 | S2-C29-C28 | 121.5 | C27-C28-C29 | 125.3 |
| C7-C8-C9   | 126.7 | C3-C4-C7   | 124.0 | C23-C24-C27 | 123.9 |
| C1-N1-C17  | 121.5 | C1-N1-C13  | 120.4 | C21-N2-C33  | 123.2 |
| C21-N2-C37 | 120.2 | C4-C7-C8   | 128.8 | C24-C27-C28 | 128.3 |
